# Supplementary material for: Semi-aromatic polyamides containing methylene and thioether units: synthesis and membrane properties
Source: Royal Society of Chemistry journal article supplement (doi:10.1039/c6ra20717k), 2016-01-01
Supplement: c6ra20717k1.pdf [file c6ra20717k1.pdf]

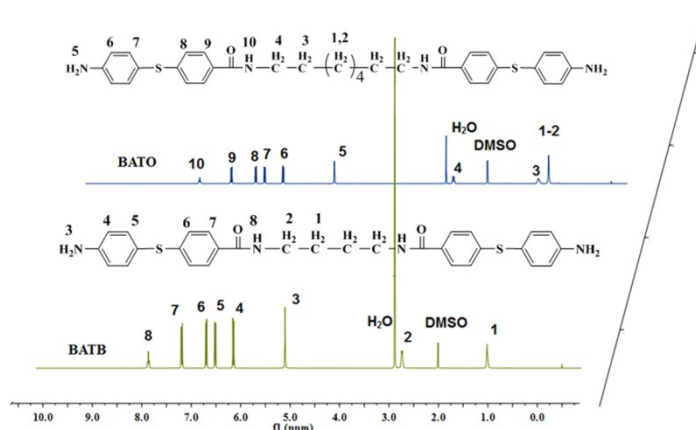

Figure S1 The  $^1\text{H-NMR}$  spectra of monomers (BATB and BATO).

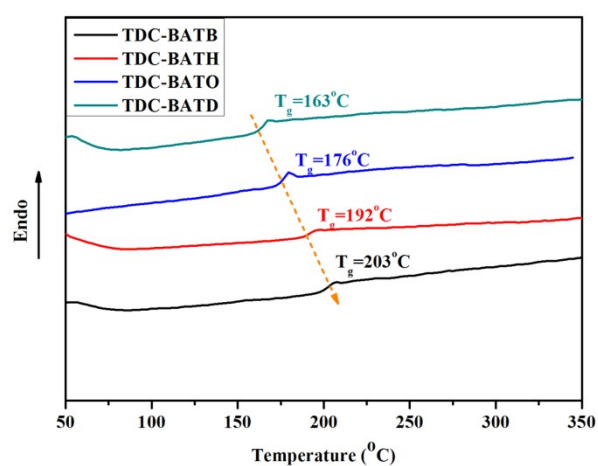

Figure S2 The DSC curves of TDC-BATB, TDC-BATH, TDC-BATO and TDC-BATD at a heating rate of  $10^{\circ}\text{C}/\text{min}$  in  $\text{N}_2$ .

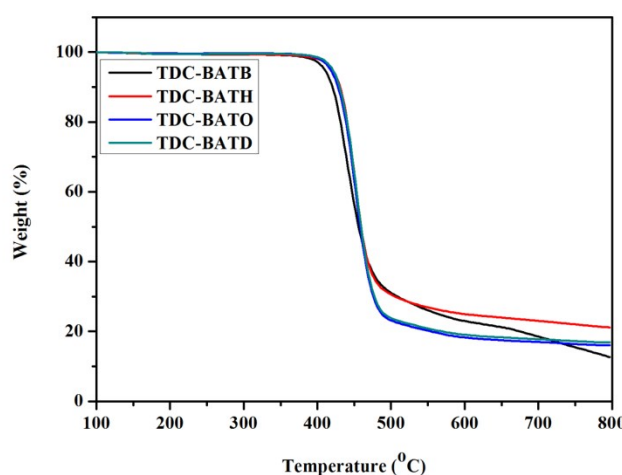

Figure S3 The TGA curves of TDC-BATB, TDC-BATH, TDC-BATO and TDC-BATD at a heating rate of  $10^{\circ}\text{C}/\text{min}$  in  $\text{N}_2$ .
